## RESEARCH ARTICLE

# A facilitated diffusion mechanism establishes the *Drosophila* Dorsal gradient

Sophia N. Carrell<sup>‡</sup>, Michael D. O'Connell<sup>‡</sup>, Thomas Jacobsen, Amy E. Pomeroy\*, Stephanie M. Hayes and Gregory T. Reeves<sup>§</sup>

## ABSTRACT

The transcription factor NF- $\kappa$ B plays an important role in the immune system, apoptosis and inflammation. Dorsal, a *Drosophila* homolog of NF- $\kappa$ B, patterns the dorsal-ventral axis in the blastoderm embryo. During this stage, Dorsal is sequestered outside the nucleus by the I $\kappa$ B homolog Cactus. Toll signaling on the ventral side breaks the Dorsal/Cactus complex, allowing Dorsal to enter the nucleus to regulate target genes. Fluorescent data show that Dorsal accumulates on the ventral side of the syncytial blastoderm. Here, we use modeling and experimental studies to show that this accumulation is caused by facilitated diffusion, or shuttling, of the Dorsal/Cactus complex. We also show that active Toll receptors are limiting in wild-type embryos, which is a key factor in explaining global Dorsal gradient formation. Our results suggest that shuttling is necessary for viability of embryos from mothers with compromised *dorsal* levels. Therefore, Cactus not only has the primary role of regulating Dorsal nuclear import, but also has a secondary role in shuttling. Given that this mechanism has been found in other, independent, systems, we suggest that it might be more prevalent than previously thought.

**KEY WORDS:** Morphogen, Tissue patterning, Mathematical modeling, Dorsal, Cactus, Shuttling

## INTRODUCTION

In a developing organism, tissues are patterned by long-range signaling enacted through morphogen concentration gradients, which carry the positional information necessary to control gene expression in a spatially dependent manner. The mechanisms by which morphogen concentration gradients form has been an area of intense study (Wartlick et al., 2009; Smith, 2009; Matsuda et al., 2016; Müller et al., 2013; Christian, 2012; Guerrero and Kornberg, 2014). For example, in the *Drosophila* wing disc, there are conflicting theories for Dpp gradient formation, including receptor-mediated transcytosis, (restricted) diffusion and cytonemes (Entchev et al., 2000; Lander et al., 2002; Schwank et al., 2011; Matsuda et al., 2016; Belenkaya et al., 2004; Roy et al., 2014). In the *Drosophila* syncytial blastoderm, the anterior-posterior (AP) Bicoid gradient, perhaps the most well-studied morphogen gradient system, has long been thought to develop through a mechanism of diffusion from a spatially localized source (Driever and Nüsslein-Volhard, 1988; Houchmandzadeh et al.,

2002; Gregor et al., 2005, 2007; Little et al., 2011). More recently, it has been proposed that the Bicoid gradient develops largely from a *bicoid* mRNA gradient, which itself developed through active transport (Spirov et al., 2009; Fahmy et al., 2014; Ali-Murthy and Kornberg, 2016).

During the same stages in which Bicoid patterns the AP axis, the maternally provided transcription factor Dorsal (Dl), which is natively found as a homodimer (Govind et al., 1992; Isoda et al., 1992; Whalen and Steward, 1993; Drier et al., 2000), also acts as a morphogen to regulate the spatial patterns of >50 genes along the dorsal-ventral (DV) axis (Reeves and Stathopoulos, 2009; Moussian and Roth, 2005; Chopra and Levine, 2009). Both *dl* mRNA and Dl protein are maternally deposited into the embryo, and Dl protein is initially uniformly distributed around the DV axis (Steward et al., 1988; Roth et al., 1989). During nuclear cycle (nc)10, when the nuclei migrate to the periphery of the syncytial blastoderm, a nuclear concentration gradient of Dl develops, with high concentrations in the ventral nuclei, graded levels in ventral-lateral (VL) nuclei, and basal levels in the nuclei on the dorsal half of the embryo (Roth et al., 1989; Liberman et al., 2009; Reeves et al., 2012). In the ventral 20% of the embryo, the highest levels of Dl are achieved, and, as a result, high threshold genes, such as *twist* (*twi*) and *snail* (*sna*) are activated, which are required to specify the future mesoderm (Stathopoulos and Levine, 2002; Reeves and Stathopoulos, 2009; Chopra and Levine, 2009). Intermediate threshold genes, such as *vnd* and *rhomboid*, are expressed in VL domains, and low threshold genes, such as *sog* and *dpp*, have boundaries at ~50% of the way around the DV axis.

The mechanisms by which the Dl nuclear concentration gradient develops are well known, partly because Dl is one of three *Drosophila* homologs of NF- $\kappa$ B. At the single nucleus/cell level, Dl is sequestered to the cytoplasm in an inactive complex with the I $\kappa$ B homolog Cactus (Cact). On the ventral side of the embryo, signaling through the Toll receptor results in the degradation of Cact, freeing Dl to enter the nucleus, where it regulates transcription (Belvin et al., 1995; Bergmann et al., 1996; Reach et al., 1996; Whalen and Steward, 1993). *cact* mutant embryos still develop a shallow Dl gradient (Bergmann et al., 1996; Roth et al., 1991; Cardoso et al., 2017), probably due to a weak bias in Dl nuclear import from Toll signaling (Drier et al., 1999, 2000). The weakly polarized DV axis in the absence of Cact activity can also be seen in the Dl target gene expression domains, which are altered, but retain some DV polarity (Roth et al., 1991; Cardoso et al., 2017).

Cytoplasmic sequestration of Dl by Cact, combined with a ventral-to-dorsal gradient of Toll signaling, is sufficient to develop a gradient of nuclear Dl concentration, and is evidently the primary driving force for the formation of spatial asymmetry in Dl nuclear concentration. However, taken alone, this mechanism would result in a local depletion of Dl from the cytoplasm surrounding the ventral nuclei to create a counter-gradient in cytoplasmic Dl (Roth et al., 1989) (Fig. 1A). This paradigm is implicitly accepted, and has been

Department of Chemical and Biomolecular Engineering, North Carolina State University, Raleigh, NC 27605, USA.

\*Present address: Curriculum in Bioinformatics and Computational Biology, University of North Carolina, Chapel Hill, NC 27599, USA.

†These authors contributed equally to this work

§Author for correspondence (greeves@ncsu.edu)

DOI: 10.1242/dev.155549

Received 31 May 2017; Accepted 23 October 2017

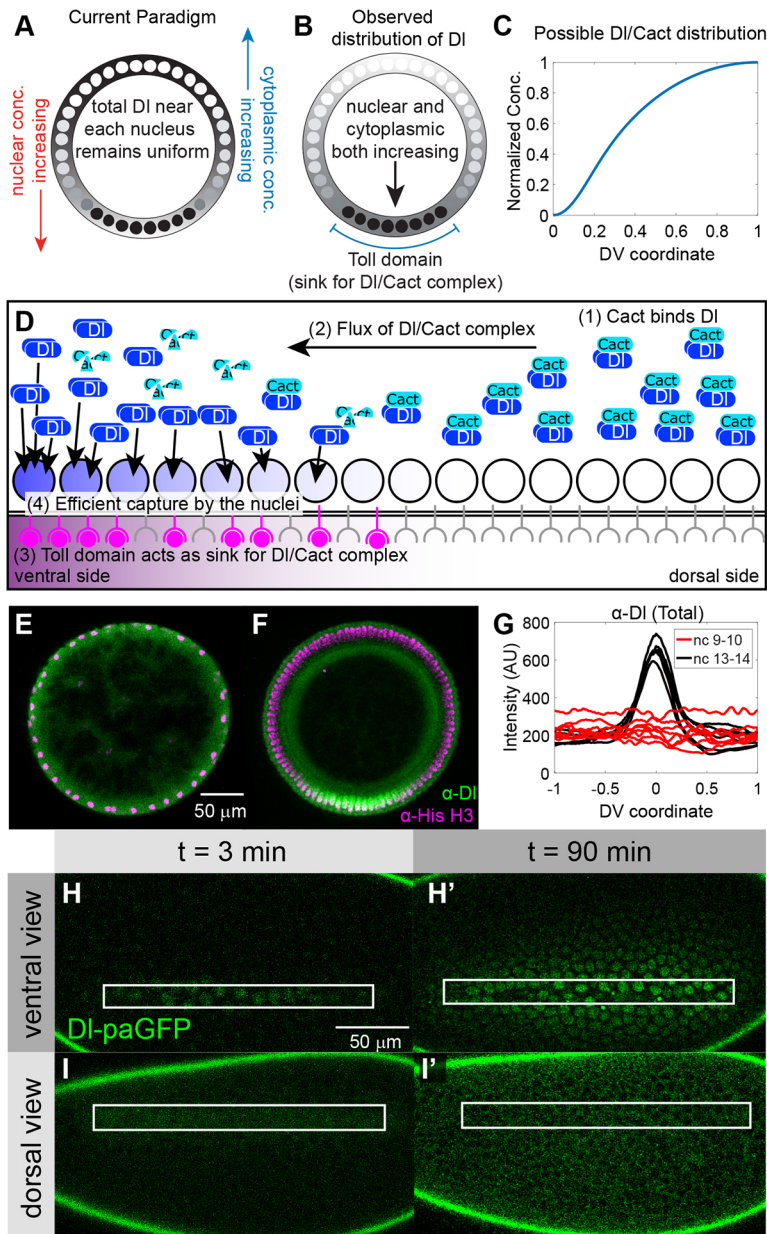

**Fig. 1. Dorsal accumulates on the ventral side of the embryo.** (A) Current paradigm of DI distribution states that total DI levels are uniform throughout the embryo. (B) Fluorescent images suggest that total DI accumulates on the ventral side. 'Toll domain' indicates the location at which Toll receptors are being activated. (C) Possible protein gradient of cytoplasmic DI/Cact complex. The DI/Cact complex is expected to have an inverse gradient owing to the ventral Toll domain. (D) Schematic of the shuttling mechanism. Toll-mediated degradation of Cact on the ventral side results in a concentration gradient of DI/Cact complex, which in turn results in a net flux of DI/Cact to the ventral side. Free DI does not diffuse back to the dorsal side because it is efficiently captured by the nuclei. Numbers indicate the four biophysical processes necessary for shuttling. (E) Cross section of an nc 10 wild-type embryo, stained for DI and nuclei. DI is equally distributed throughout the embryo. (F) Total DI has accumulated at the ventral midline by late nc 14. (G) Quantification of total  $\alpha$ -DI fluorescence in nc 9-10 (red) and nc 13-14 (black) embryos. (H-I') Photoactivation of embryos from mothers carrying one copy of wild-type (wt) DI and one copy of DI-paGFP indicates that DI diffuses throughout the embryo. The activation area is within the white boxes; anterior to the left. Panels show activation near the ventral midline ~3 min (H) and 90 min (H') after first activation, and activation near the dorsal midline ~3 min (I) and 90 min (I') after first activation. See also Movies 1 and 2, Fig. S1.

depicted many times in the literature (e.g. in Haskel-Ittah et al., 2012; Rushlow and Shvartsman, 2012). However, this paradigm is in contrast to recent observations that nuclear+cytoplasmic levels of DI fluorescence accumulate on the ventral side of the embryo over time (Reeves et al., 2012) (Fig. 1B). It is important to note that fluorescence measurements of DI likely do not distinguish between free DI and bound DI (DI/Cact complex). The mechanism by which this ventral accumulation of total DI (defined henceforth as the sum of local nuclear+cytoplasmic levels of bound+free DI) takes place remains unknown, as does the question of whether accumulation is necessary for proper gene expression patterning and the fitness of the embryo.

One possible mechanism is that the hypothesized counter-gradient in cytoplasmic DI, mentioned above, might drive free DI to diffuse to the ventral side. However, this is unlikely to be the case, as the predominant DI-containing species on the dorsal side of the embryo should be DI/Cact complex, not free DI. Therefore, we propose that the ventral accumulation of total DI occurs by a facilitated diffusion, or 'shuttling' mechanism via DI/Cact complex

(Shilo et al., 2013). According to this mechanism, a carrier molecule (Cact) helps to shuttle the morphogen up its concentration gradient so that it may accumulate in one location. In the DI/Cact system, the shuttling hypothesis states that a dorsal-to-ventral concentration gradient of cytoplasmic DI/Cact complex develops as the result of Toll-mediated degradation of Cact, which in turn results in ventrally directed flux of DI (Fig. 1C).

The shuttling mechanism has been previously described and is responsible for gradient formation in the Dpp/BMP signaling pathway (Ben-Zvi et al., 2008; Eldar et al., 2002; Holley et al., 1996; Marqués et al., 1997; Mizutani et al., 2005; Shimmi et al., 2005; Wang and Ferguson, 2005; Ashe and Levine, 1999; Dorfman and Shilo, 2001; Umulis et al., 2006). It has also been suggested for the formation of the Spätzle gradient upstream of Toll signaling (Haskel-Ittah et al., 2012). It should be noted that the DI/Cact system has each of the four features required for shuttling to occur in the embryo (Fig. 1D) (Shilo et al., 2013): (1) the primary molecule (DI) binds to a 'carrier' molecule (Cact) that protects it from capture/

degradation; (2) the primary/carrier complex is diffusible on a global scale (shown in this study); (3) the complex is broken in a spatially dependent manner (through Toll signaling on the ventral side of the embryo); and (4) when free of the carrier, the primary molecule is captured (in this case, by the nuclei) or degraded.

The main analysis in this paper was performed using a combination of computational model predictions and experimental validation to support the shuttling hypothesis. To this end, we first demonstrated that DI diffuses globally throughout the embryo, so that each of the four criteria above are met for the DI/Cact system. Next, we used a simplified version of previously published computational models (O'Connell and Reeves, 2015; Kanodia et al., 2009; Ambrosi et al., 2014) to predict the outcome of experiments in which shuttling is compromised by lowering DI diffusion: depending on the severity of the perturbation, the DI gradient widened, became flat on top, or split into two peaks (i.e. there was no longer a single peak at the ventral midline). Through careful analysis of BAC-recombineered, GFP-tagged DI constructs, which slow the mobility of DI, we validated the predicted outcomes of the shuttling hypothesis. The same three phenotypes are also seen in embryos from *dl* heterozygous mothers, in embryos with a widened Toll domain, and in embryos with an ectopically expressed, AP DI gradient (Liberman et al., 2009; Roth and Schüpbach, 1994; Huang et al., 1997). To account for these phenotypes, we extended our simplified model to take into account the possibility that active Toll receptors are limiting in the VL regions of the Toll domain. The extended Toll saturation model successfully explained the phenotypes in those three sets of embryos. We experimentally validated the Toll saturation assumption by showing that the single, curved DI gradient peak is restored in *dl* heterozygotes by lowering the maternal *Toll* dosage, as well as in embryos with a wide Toll domain, by increasing the dosage of DI.

Our data show that shuttling does occur, and that it is necessary when maternal *dl* levels are compromised. Although *dl* heterozygous mothers in an otherwise wild-type background are not sterile, we showed that embryos from mothers carrying a single copy of *dl-GFP* and zero endogenous copies of *dl* are nonviable, owing to severe shuttling-based defects in the DI gradient and the consequent failure to express *sna* in a sufficient number of ventral cells. The data are less clear as to whether shuttling is necessary for embryonic fitness when maternal *dl* levels are not compromised (Roth et al., 1991; Cardoso et al., 2017). Even so, we argue that the data, on balance, favor the necessity of the shuttling mechanism in wild-type embryos. We conclude that, in addition to its primary role of regulating DI entry into the nucleus, Cact performs a secondary, but important, role in DI gradient formation: shuttling DI to the ventral side to form the mature gradient.

## RESULTS

### DI accumulation on the ventral side of the embryo results from movement of DI

Initially, DI is uniformly distributed along the DV axis of the developing embryo (Roth et al., 1989) (Fig. 1E,G); during nc 11–14, it accumulates on the ventral side (Fig. 1F,G). This observation is consistent with previously published fluorescent images of anti-DI immunostaining in fixed embryos and in images of DI-GFP fluorescence in live embryos (Kanodia et al., 2009; Reeves and Stathopoulos, 2009; Liberman et al., 2009; Reeves et al., 2012). In particular, live imaging of a DI-Venus construct in optical cross sections showed that, even during mitosis, when the nuclear concentration gradient is abolished, there is a bias of total DI on the ventral side (Reeves et al., 2012). To measure this bias, we imaged and quantified cross sections of fixed younger (nc 9–10) embryos (Fig. 1E) and

compared their total DI distribution to similar quantifications of older (nc 13–14) embryos (Fig. 1F). We found that, in younger embryos, total DI was distributed evenly throughout the embryo, while older embryos displayed a total DI gradient with a strong ventral peak, similar to quantifications of the DI nuclear concentration gradient (Fig. 1G).

The mechanism for this overall polarization of total DI in the embryo could stem from net flux of DI to the ventral side of the embryo. Previous work showed that, on short time scales (seconds), the free diffusion of DI-GFP is rapid enough that nucleocytoplasmic compartments (the regions surrounding a single nucleus) appear well mixed, while there are barriers to movement between neighboring nucleocytoplasmic compartments (Delotto et al., 2007). On the other hand, on longer time scales (minutes), exchange between nucleocytoplasmic compartments is possible, which we consider behaves like diffusion on coarse length scales. To confirm the global movement of DI throughout the embryo (hereafter referred to simply as diffusion), we used a photoactivatable GFP (paGFP) tag (Patterson and Lippincott-Schwartz, 2002), and noticed that DI appears in regions of the embryo >7–10 nuclei away from the site of paGFP activation over a time span of 90 min (Fig. 1H,I; Fig. S1), during which the activation region was under near-constant photoactivation (see Materials and Methods). The distance over which activated DI can spread appears to depend on the region of the embryo. When activated near the ventral midline, DI-paGFP moves from its location of activation and fills adjacent nuclei, extending ~6–7 nuclei away (Fig. 1H,H'; Movie 1). When activated on the dorsal side of the embryo, DI-paGFP can eventually be seen in all nuclei in view, and shows a typical pattern of exclusion from nuclei in more dorsal regions and moderate uptake into the nuclei in more lateral regions (Fig. 1I,I'; Movie 2). The difference in mobility is likely to be caused by nuclear capture of free DI on the ventral side. In any case, our observation of global movement of DI within the embryo provides the final, previously unconfirmed, physical process necessary for shuttling to occur.

### Model analysis and experimental prediction

To determine whether the four biophysical processes outlined in the Introduction are sufficient to drive the accumulation of DI on the ventral side of the embryo, we analyzed a simplified model of DI/Cact/Toll interactions in the early embryo (Fig. 2A). Our model included partial differential equations for four species: nuclear DI, cytoplasmic DI, cytoplasmic Cact, and cytoplasmic DI/Cact complex (see Materials and Methods). These equations describe the processes of DI/Cact binding ( $k_{bind}$ ); the production ( $V_{cact}$ ; not shown in Fig. 2A) and degradation of Cact ( $k_{deg}$ ); the nuclear import/export of DI ( $k_{in}$ ,  $k_{out}$ ); the Toll-mediated dissociation of the DI/Cact complex ( $k_{diss}$ ); and the intercompartmental movement of cytoplasmic species ( $D$ ; Fig. 2A). The catalytic activity of Toll signaling was modeled phenomenologically by allowing  $k_{diss}$  to be a function of  $x$ :  $k_{diss}(x) = k_{diss,0} \exp(-0.5x^2/\phi^2)$ , where  $\beta$  models the strength of Toll signaling and  $\phi$  is a parameter that controls the spatial extent of Toll signaling.

We quantitatively defined shuttling as the scenario in which there is a net flux of DI-containing species to the ventral 33% of the embryo (see Materials and Methods). We simulated  $10^5$  randomly chosen data sets from among reasonable allowed variations in parameter values (see Supplementary Materials and Methods) and examined under what conditions shuttling would occur. We found that the diffusivity of the DI/Cact complex ( $D_{DC}$ ) must be greater than the effective diffusivity of free DI for shuttling to occur. In our simplified model, nuclear and cytoplasmic DI are assumed to be in equilibrium, which makes the effective diffusivity of DI  $D_{DI}^{eff} = D_{DI}/(1 + K_{eq})$ , where  $K_{eq} = k_{in}/k_{out}$  (see Supplementary Materials and



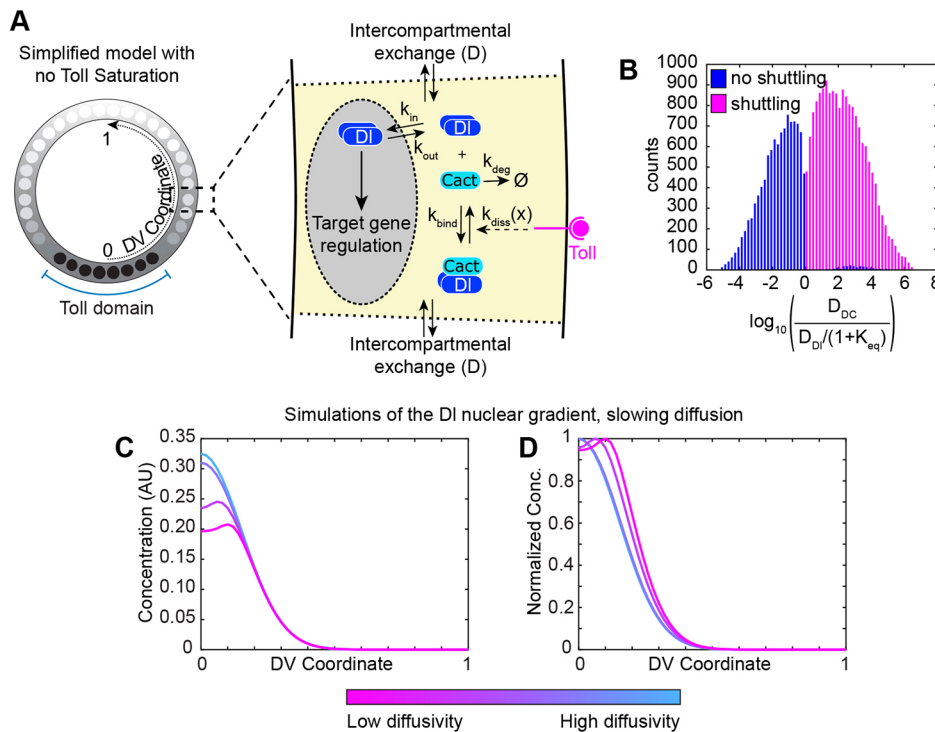

**Fig. 2. Model for predicting a shuttling mechanism and mutant phenotypes.**

(A) Simplified model of DI gradient dynamics in which Toll is not saturable. (B) Parameter sets for which shuttling occurs are nearly perfectly identified by the inequality  $D_{DC}/[D_{DI}/(1+K_{eq})]>1$ , where  $D_{DI}/(1+K_{eq})$  represents the effective diffusivity of free DI under equilibrium conditions. (C) Slowing diffusion to reduce rate of shuttling results in a hallmark progression of phenotypes. The DI gradient widens (width parameter  $\sigma$  increases), flattens at the peak, or obtains a split peak (i.e. the peak is no longer at the ventral midline). (D) DI gradients found in C, normalized. The normalization reveals the widening of the gradients. Colorbar indicates strength of perturbation. See also Fig. S2.

Methods for more details). In other words, shuttling occurs when  $D_{DC}/D_{DI}^{eff}>1$  (Fig. 2B). This is relatively unsurprising, as the DI/Cact complex must be able to diffuse toward the ventral midline more efficiently than free DI can diffuse away. Furthermore, difference in diffusivities between the free activator and the inhibitory complex has previously been shown to be a hallmark of a shuttling system (Eldar et al., 2002). The equilibrium constant for nuclear import also plays an important role because nuclear capture of free, cytoplasmic DI must be sufficiently strong to prevent DI from diffusing back to the dorsal side of the embryo (Fig. 1D). See Supplementary Materials and Methods for more details.

Further analysis of our model showed that the mechanism of facilitated diffusion can be tested by slowing diffusion of the DI/Cact complex. The model predicts that different instances in a hallmark series of phenotypes will be observed, depending on the severity of the perturbation. In order of increasing strength of perturbation: the DI gradient widens, becomes flat on top, or splits into two peaks (Fig. 2C, D). These predictions and the shuttling phenomenon itself arise naturally out of biophysical processes known to occur in the embryo: global movement, binding of DI and Cact, Toll-mediated destruction of the DI/Cact complex on the ventral side, and nuclear capture of free DI. Indeed, previous models of the DI gradient, which included these processes, also exhibit shuttling, even when it was not considered in the models (Fig. S2, Supplementary Materials and Methods) (Kanodia et al., 2009; Ambrosi et al., 2014; O'Connell and Reeves, 2015). In particular, in previous work using a model of the DI/Cact system, the authors found that increasing the diffusion rate caused the gradient to sharpen (Ambrosi et al., 2014), which is the same prediction detailed here (Fig. 2C,D). We analyzed the model presented in that study, and show that this result arose because shuttling was indeed occurring in that model, even though the authors did not intend it to be (Fig. S2).

### Decreased diffusion of the DI/Cact complex widens the DI gradient

Our approach to slowing the diffusion of the DI/Cact complex was to tag DI with a bulky protein domain. Multiple versions of DI tagged with

GFP variants have been made to study DI gradient dynamics in living embryos (Delotto et al., 2007; Reeves et al., 2012); in two instances, GFP tags caused the DI gradient to expand as predicted by the shuttling mechanism (Fig. 2C,D). Previous work has shown that tagging DI with a monomeric Venus (DI-mVenus) causes the DI gradient to widen, while a GFP tag causes a much greater widening (Lieberman et al., 2009; Reeves et al., 2012). We surmised that the difference between these scenarios is that Venus is an obligate monomer, whereas the GFP construct weakly dimerizes (Zacharias et al., 2002).

However, as these observations were comparing GFP to mVenus, we wished to investigate further by minimizing differences between the monomeric and dimeric GFP variants. Therefore, we constructed a transgenic fly line carrying a BAC-recombineered DI tagged with monomeric GFP (DI-mGFP; see Materials and Methods). The weak dimerization of GFP can be abolished by the A206K mutation, so that GFP<sup>A206K</sup> is an obligate monomer (Zacharias et al., 2002). Together with a wild-type fly line and a line carrying the DI tagged with a GFP that weakly dimerizes (DI-dGFP) (Reeves et al., 2012), this created an 'allelic series' of DI constructs with progressively decreasing mobility. If the shuttling hypothesis is correct, we would expect that lowering the mobility would widen the gradient. First, we measured the gradient width in fixed wild-type embryos using an antibody against DI and found the width parameter,  $\sigma$ , to be  $0.147\pm0.002$  (mean $\pm$ s.e.m. here and elsewhere) (Fig. 3; Fig. S3A; see Supplementary Materials and Methods for a description of the width parameter) (Lieberman et al., 2009; Reeves et al., 2012; Garcia et al., 2013).

Next, we investigated the DI-mGFP embryos. These embryos are from *dl, dl-mGFP/+* mothers (one copy of DI-mGFP, one functional copy of endogenous DI). Because DI naturally self-associates (Govind et al., 1992; Isoda et al., 1992; Whalen and Steward, 1993; Drier et al., 2000), three species of DI dimer would exist in these embryos: DI:DI, DI:DI-mGFP and DI-mGFP:DI-mGFP. Therefore, the effective, overall mobility of DI in these embryos would be slightly lower than in wild type. As predicted by the shuttling hypothesis, these DI-mGFP embryos have gradients slightly wider than wild type ( $\sigma=0.184\pm0.005$ ;  $P=10^{-7}$ ; Fig. 3).

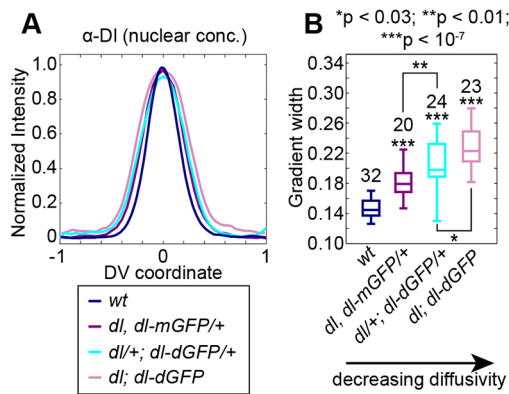

**Fig. 3. Decreasing the diffusion of Dl/Cact increases the width of the Dl gradient.** (A) Normalized average plots of the nuclear fluorescence of  $\alpha$ -Dl in embryos with two copies of wt *dl* (wt, blue), one copy of wt *dl* and one copy of *dl-mGFP* (*dl; dl-mGFP/+*, purple), one copy of wt *dl* and one copy of *dl-dGFP* (*dl/+; dl-dGFP/+*, cyan), and zero copies of wt *dl* and two copies of *dl-dGFP* (*dl; dl-dGFP*, pink). (B) Box plot of gradient widths ( $\sigma$ ) for the genotypes in A. Here and in Figs 4–6, boxes indicate interquartile range (IQR: from the 25th to the 75th percentile of the data); whiskers extend a maximum of 1.5 times the width of the IQR from the box; outliers (plus signs) are defined as points that lie outside the whiskers; numbers indicate sample size; asterisks without connecting lines indicate statistical difference from wild type. Colors match the scheme in A. See also Fig. S3.

Third, we investigated whether the *Dl-dGFP* embryos would have even wider gradients than the *Dl-mGFP* embryos. Therefore, we analyzed the gradient in embryos from mothers carrying one copy of *dl-dGFP* (Reeves et al., 2012) and heterozygous null for endogenous *dl* (genotype *dl/+; dl-dGFP/+*). In these embryos, heterodimers of endogenous *Dl* and *Dl-dGFP* might form weak interactions with similar heterodimers, which would result in larger groups of heterodimers with slower mobility. The situation is further exacerbated if the dimer happens to be a homodimer of *Dl-dGFP*, which should account for ~25% of the *Dl* dimer species. We found that the *Dl* gradient in these embryos widened significantly as compared to wild type ( $\sigma=0.207\pm0.007$ ;  $P=2\times10^{-9}$ ; Fig. 3).

Finally, we analyzed embryos completely lacking endogenous *Dl* and with two copies of *Dl-dGFP* (maternal genotype: *dl; dl-dGFP*). In these embryos, 100% of the *Dl* molecules are fused to *dGFP*, so that every *Dl*-containing dimer has the ability to weakly interact with two other *Dl-dGFP* dimers. As predicted by the shuttling hypothesis, the *Dl* gradients in these embryos were also widened compared to wild type ( $\sigma=0.228\pm0.008$ ;  $P=10^{-12}$ ; Fig. 3). Moreover, the ‘allelic series’ behaved as predicted: embryos with progressively less mobile *Dl* had progressively wider gradients.

To further test the predicted phenotype of slowing diffusion, we also examined embryos with Venus-tagged *Dl* (Reeves et al., 2012),  $\beta$ -galactosidase-tagged *Dl* (Govind et al., 1996) and  $\beta$ -galactosidase-tagged *Cact* (Fernandez et al., 2001). In each of these cases, the phenotype expected from the shuttling hypothesis was found (Supplementary Materials and Methods, Fig. S3B,C).

The length scale of a concentration gradient can be altered by changing the rate of capture (in this case, by the nuclei) in addition to diffusion. Therefore, we used a combination of photobleaching experiments, to measure the import and export rate of *Dl-dGFP* and *Dl-mGFP*, and modeling, to show that only perturbing diffusion, and not nuclear import/export, results in a shuttling-based phenotype (Fig. S3D–O, Movie 3, Supplementary Materials and Methods).

### Toll saturation allows decreasing *Dl* dosage to widen and flatten the *Dl* gradient

In embryos from mothers heterozygous null for *Dl* (hereafter referred to as *dl/+* embryos), the shape of the gradient becomes slightly wider and flatter, sometimes to the point of generating a double peak (Fig. 4A–D; note especially in Fig. 4B the local minimum at the ventral midline and local maxima elsewhere) (Lieberman et al., 2009; Ambrosi et al., 2014). This phenotype bears striking resemblance to the model predictions for lowering diffusion (Fig. 2C,D); therefore, we investigated whether the shuttling mechanism could possibly explain the phenotype in *dl/+* embryos. However, model simulations showed that reducing the *dl* dosage could not significantly change the width or the shape of the *Dl* gradient, much less result in a double peak (Ambrosi et al., 2014) (Fig. S4A–D).

One mechanism that could explain this phenotype is saturation of active Toll receptors. If the domain of active Toll signaling is graded in space (Haskel-Ittah et al., 2012; Rahimi et al., 2016), active Toll receptors should be limiting at the domain edge. If active Toll saturation is sufficiently extensive in wild-type embryos, then the formation of a smooth peak is the result of sufficient numbers of *Dl/Cact* complexes bypassing the saturated Toll regime and arriving at the ventral midline (Fig. 4E). However, in *dl/+* embryos, less *Dl* implies fewer *Dl/Cact* complex molecules will arrive at the ventral midline (Fig. 4F), resulting in a wider, flatter and sometimes split peak of nuclear *Dl*. However, previous models did not account for this possibility because the rate of Toll-mediated *Cact* degradation was assumed to be proportional to the concentration of *Dl/Cact*, creating a potentially unlimited sink, even at the edges of the active Toll domain (O’Connell and Reeves, 2015; Kanodia et al., 2009; Ambrosi et al., 2014). Therefore, we extended our simplified mathematical model (Fig. 2A) to account for the possibility that active Toll receptors numbers are limiting (Fig. 4G; see Materials and Methods). In the remainder of this paper, we use this extended model. When active Toll receptors are saturable, simulated *dl/+* embryos have widened, flattened gradients (Fig. S4E,F).

To experimentally test whether active Toll receptors are limiting, we compared *Dl* gradients in wild-type embryos and *dl/+* embryos with those from *dl/+; Tl/+* mothers (hereafter *dl/+; Tl/+* embryos). In *dl/+; Tl/+* embryos, reducing the Toll dosage should partially ‘rescue’ the saturation of the active Toll receptor, and thus result in a smoother *Dl* gradient peak at the ventral midline. We found that the profile of total *Dl* in these embryos is, on average, more smoothly peaked (Fig. 4H; Fig. S4G–I). To determine whether the gradient peaks are different in *dl/+* versus double-heterozygote embryos, we calculated two measures of peak shape: location of peak (Fig. 4I,J) and intensity of the peak at the ventral midline (Fig. 4I,K). In both cases, the *dl/+* embryos were statistically different from the *dl/+; Tl/+* embryos, which validates our hypothesis that active Toll receptors are limiting.

### Perturbing both mobility and dosage has a combined effect

Our model also predicts that simultaneously lowering both dosage and mobility would have a combined effect on the severity of the shuttling phenotype. To test this hypothesis experimentally, we investigated embryos from mothers that carry a single copy of *dl-dGFP* and no endogenous *dl* (*dl; dl-dGFP/+*). In our and previous studies, this genotype is observed to be female sterile; two copies of *dl-dGFP* are necessary to rescue the mutant (Lieberman et al., 2009; Reeves et al., 2012). We found that *dl; dl-dGFP/+* embryos have highly widened gradients ( $\sigma=0.219\pm0.009$ ), with severe flat-top/mild double-peaked phenotypes (Fig. 4D and Fig. 5A,B). However,

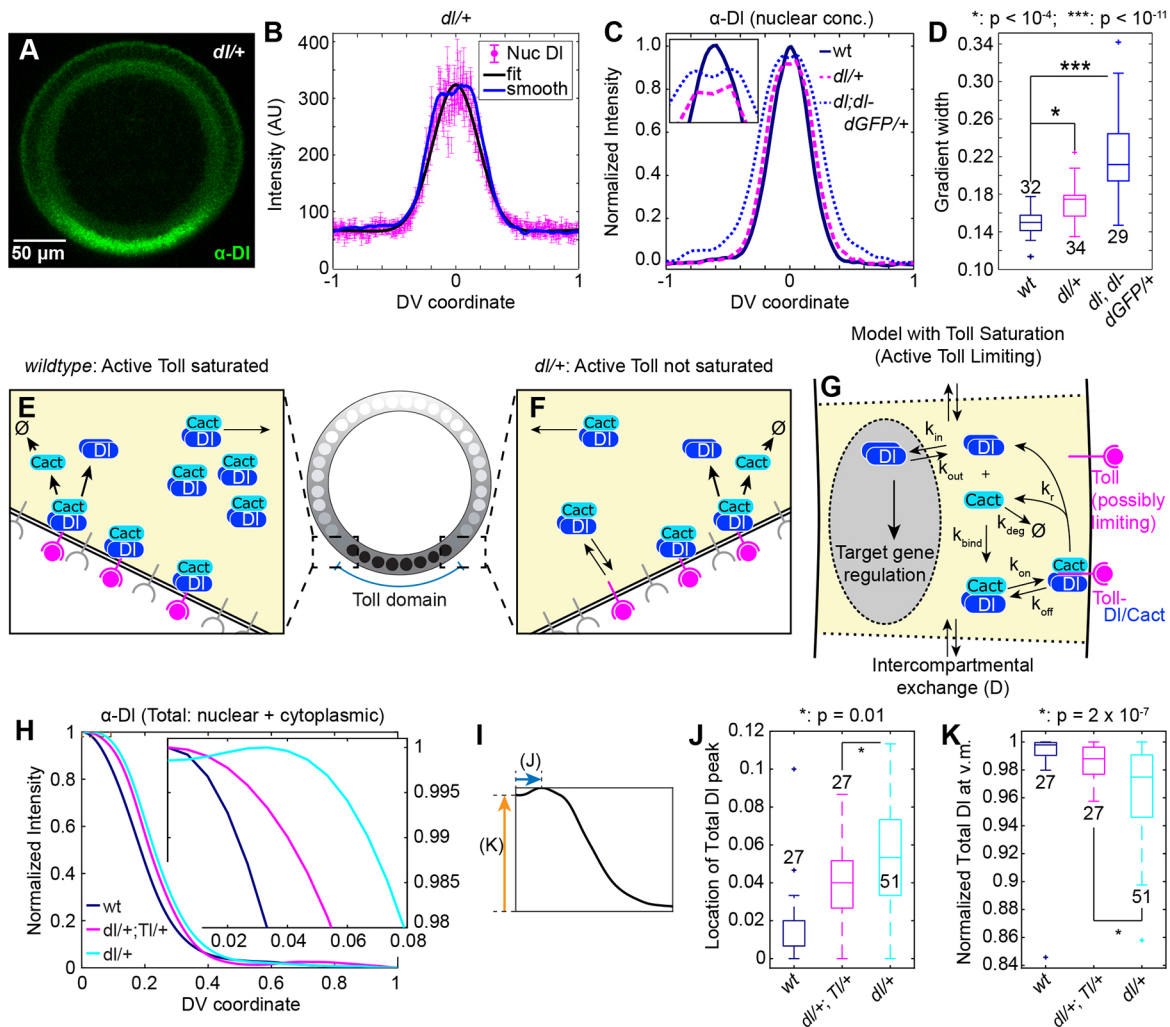

**Fig. 4. Embryos from mothers heterozygous for DI have a different-shaped DI gradient that is explained by Toll saturation.** (A) Cross section of an nc 14 embryo from a mother heterozygous for *dl* immunostained for DI. (B) Plotted nuclear intensity of embryo in A as a function of DV coordinate (each magenta dot is one nucleus). Error bars indicate s.e.m. of nuclear intensity. Blue curve is the data of the individual nuclei smoothed by a sliding window of 50 nuclei; black curve is a fit of the data to a Gaussian. (C) Normalized average plots of the  $\alpha$ -DI nuclear fluorescence in wild-type, *dl/+* and *dl; dl-dGFP/+* embryos. Inset highlights differences in peak shape. (D) Box plot of gradient widths ( $\sigma$ ) for the embryos in C. (E) Schematic of active Toll receptor saturation in wild-type embryos. In the edges of the Toll domain, DI/Cact complexes can bypass active Toll receptors that are already bound by other DI/Cact complexes. (F) Schematic of lack of active Toll saturation in *dl/+* embryos. Fewer DI/Cact complexes can penetrate deep into the Toll domain. (G) Extended model of the DI/Cact system in which active Toll receptors are saturable. (H) Normalized, average profiles of total  $\alpha$ -DI fluorescence in wild-type, *dl/+; Tl/+* and *dl/+* embryos. Inset reveals the difference in peak shape. The same color scheme and sets of embryos are presented in J and K. (I) Illustration of the variables compared in J and K. Blue arrow illustrates the distance from the ventral midline where the gradient peaks, and is compared across genotypes in J. Orange arrow illustrates the normalized value of the DI gradient at the ventral midline, and is compared across genotypes in K. (J) Box plot of locations of total DI peak (see blue arrow in I for embryos in H). (K) Box plot of normalized total DI peak levels at the ventral midline (see orange arrow in I for embryos in H). See also Fig. S4.

it should be noted that  $\sigma$  is a less accurate measure of the width when the gradient is not bell shaped.

Because the peak shape is severely perturbed in *dl; dl-dGFP/+* embryos, we surmised that gene expression could be disrupted, which might explain why *dl; dl-dGFP/+* females are sterile. Therefore, we analyzed *sna* expression in *dl; dl-dGFP/+* embryos ( $n=33$ ) and found that these embryos either lacked *sna* expression entirely (16/33), had *sna* expression too faint to quantify above background (5/33), or expressed *sna* in a very narrow domain (Figs 5B–E; Fig. S5), confirming our hypothesis that the double perturbation results in a breakdown of the typically robust patterning system. By contrast, embryos from *dl; dl-dGFP* mothers have normal *sna* expression (Fig. 5C,E), which shows that DI-dGFP retains transcriptional function. Furthermore, embryos from *dl; dl-mVenus/+* mothers, which have a less severe shuttling defect than

*dl; dl-dGFP/+* embryos, have robust *sna* expression (Fig. S5C,D) and are viable (our observations and Reeves et al., 2012). This result suggests that shuttling is indeed exacerbated in these embryos and that this shuttling defect is responsible for the female sterility.

#### Increasing the width of the active Toll domain results in a split peak of DI

The shuttling hypothesis predicts that severe widening of the active Toll domain results in a split DI gradient (Fig. S6A,B). As the extent of the Toll domain is controlled by Gurken/EGFR signaling during oogenesis (Sen et al., 1998; Schüpbach, 1987), we analyzed embryos from mothers carrying a hypomorphic EGFR allele (*Egfr<sup>1</sup>*) (Roth and Schüpbach, 1994). We found that embryos from mothers heterozygous for this allele have significantly widened DI gradients, and most (10/12) embryos from homozygous mothers have gradients



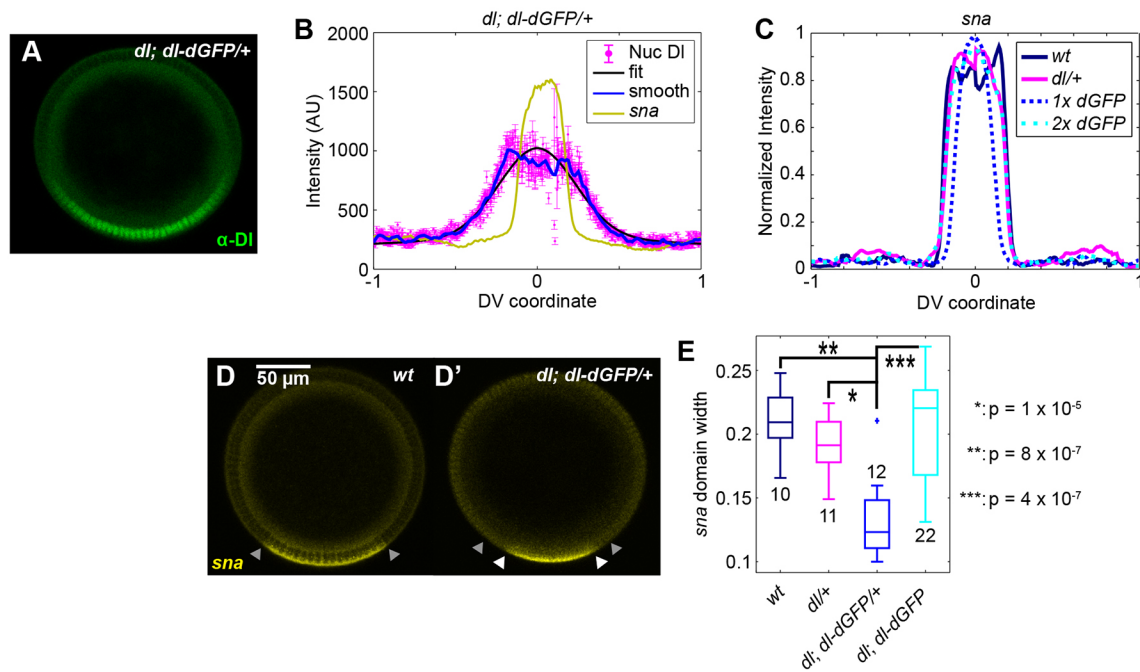

**Fig. 5. Simultaneous perturbations to shuttling result in defects in the DI gradient and in the *sna* domain.** (A) Cross section of an nc 14 *dl; dl-dGFP/+* embryo immunostained for DI. (B) Quantification of  $\alpha$ -DI nuclear fluorescence of the embryo in A. The *sna* domain is also shown (gold). (C) The average *sna* domain from embryos in Fig. 4C,D, plus *dl; dl-dGFP* embryos (labeled 1 $\times$  dGFP). (D,D') *sna* mRNA expression in wild type (D) and *dl; dl-dGFP/+* (D'). The embryo in D' is the same embryo as in A and B. Arrowheads indicate width of *sna* domain in wild type (gray) and *dl; dl-dGFP/+* (white). (E) Box plot of *sna* domain widths for the embryos in C. *sna* domains in *dl; dl-dGFP* embryos are statistically narrower than those in other genotypes. See also Fig. S5.

so wide that the peak splits (Fig. 6A–D). This result is consistent with previous reports that various *gurken* and *Egfr* mutations generate a duplicated DI gradient as measured by DI staining, Twist staining, and sites of ventral furrow formation (Roth and Schüpbach, 1994), which are not readily explained in the absence of a shuttling phenomenon (Meinhardt, 2004; Moussian and Roth, 2005; Haskel-Ittah et al., 2012).

A model with Toll saturation predicts that the split peak can be alleviated either by decreasing the levels of active Toll receptors or by increasing the dosage of maternal *dl* (Fig. S6C–F). We chose to test the possibility by examining embryos from mothers carrying one (*Egfr<sup>1</sup>; dl<sup>RC/+</sup>*) or two (*Egfr<sup>1</sup>; dl<sup>RC</sup>*) extra copies of a DI rescue construct (Reeves et al., 2012) in the *Egfr<sup>1</sup>* background. These embryos have three or four copies of full-length DI, respectively. We found that, as our model predicts, increasing the dosage of maternal *dl* reduces the severity of the split-peak phenotype (Fig. 6E; Fig. S6G–I), providing further evidence for active Toll receptor saturation.

#### An AP gradient of DI supports the shuttling hypothesis

It has been suggested that a shuttling phenomenon also occurs through the processing of Spätzle (Spz), the ligand for Toll signaling (Haskel-Ittah et al., 2012), which might explain some of the phenotypes described here. To determine whether the hallmark phenotypes of shuttling could occur without assistance from the protease cascade or Spz processing, we expressed a constitutively active form of Toll (Toll<sup>10b</sup>) at the anterior pole of the developing embryo using the *bicoid* (*bcd*) 3' UTR and the *bcd* promoter, similar to previously performed experiments using the stronger *Hsp83* promoter (Huang et al., 1997). Embryos from mothers carrying this construct (*bcd>Toll<sup>10b</sup>; bcd* 3' UTR) have an AP DI gradient in addition to the native DV gradient. Naïvely, one may expect that the existence of two gradients of active Toll signaling would result in higher concentrations of nuclear DI where the two overlap. By

contrast, the shuttling hypothesis predicts that DI nuclear concentration would be depleted in the region where both gradient tails overlap, as the two competing DI/Cact sinks cause Cact to shuttle DI toward both the anterior pole and the ventral midline (Fig. 7A–C). This prediction is borne out in experiments, as these embryos show a decreased intensity of the DI gradient near the region of overlap. Furthermore, 64% (9/14) of these embryos show a visible narrowing of the *sna* expression domain at ~30% egg length, consistent with previously published data (Fig. 7B,C) (Huang et al., 1997). Our results show domain narrowing rather than a gap as previously reported, owing to the weaker *bcd* promoter.

Our modeling results further support that the shuttling mechanism is responsible for this phenomenon (Fig. 7C). We expanded our model system from a one-dimensional array of nuclear compartments to a two-dimensional array, and added a second Toll signaling domain perpendicular to the first (Supplementary Materials and Methods). Our simulation results show that the overlap between the AP and DV Toll domains creates a low point in nuclear DI concentration, similar to our experimental results. We then approximated a threshold for *sna* expression based on the DV DI gradient, and found that the local minimum in DI concentration results in reduced or abolished *sna* expression in that region (Fig. 7C').

We also examined embryos from mothers carrying a homozygous mutation in *gastrulation defective* (*gd<sup>1</sup>*), which eliminates the endogenous ventral-to-dorsal gradient. Swapping the *bcd* promoter for the stronger *Hsp83* promoter (*Hsp83>Toll<sup>10b</sup>; bcd* 3' UTR construct; Huang et al., 1997), we were able to create a wider DI gradient at the anterior pole. Half of these embryos (7/16) show two peaks of DI (Fig. 7D–E); furthermore, they have a double peak of *sna* (Trisnadi et al., 2013). To determine whether this double-peak phenomenon was a result of the embryo's geometry at the pole, we analyzed embryos with an AP DI gradient initiated by the weaker *bcd* promoter. These embryos showed no such double-

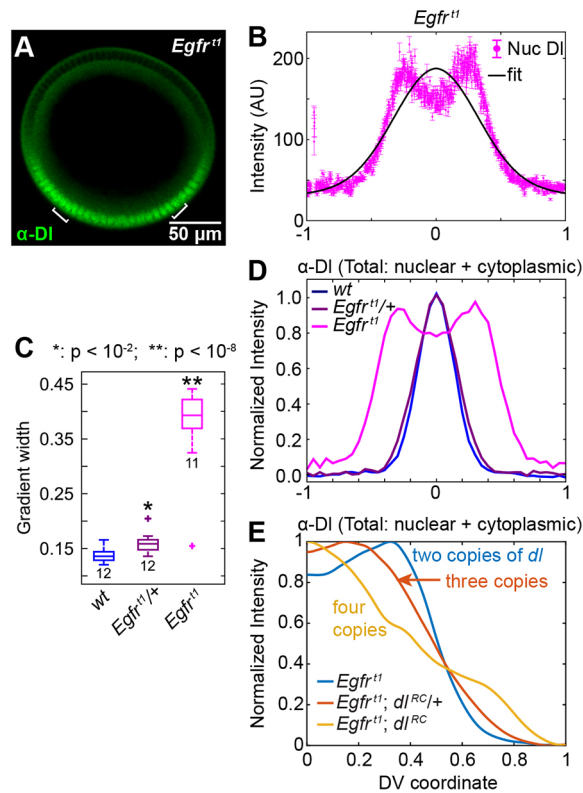

**Fig. 6. The hypomorphic allele *Egfr<sup>rt</sup>* significantly widens the DI gradient.** (A) Cross section of an *Egfr<sup>rt</sup>* embryo immunostained for DI. Brackets indicate peaks of nuclear DI. (B) Plotted  $\alpha$ -DI nuclear fluorescence of embryo in A as a function of DV coordinate (each pink dot is one nucleus). The shape has changed significantly from wild type, as the Gaussian curve (black) does not represent the gradient well. Error bars indicate s.e.m. of nuclear intensity. (C) Box plot of gradient widths ( $\sigma$ ) for wild-type, *Egfr<sup>rt</sup>/+* and *Egfr<sup>rt</sup>* embryos. Numbers indicate sample size. (D) Normalized average plot of total  $\alpha$ -DI fluorescence (nuclear+cytoplasmic) in the embryos in C, with the same color scheme. (E) Normalized total  $\alpha$ -DI fluorescence (nuclear+cytoplasmic) averaged from *Egfr<sup>rt</sup>*, *Egfr<sup>rt</sup>; dI<sup>RC</sup>/+* and *Egfr<sup>rt</sup>; dI<sup>RC</sup>*. See also Fig. S6.

peak effect (Fig. S7). These results further support our shuttling hypothesis as the DI gradient progresses from narrow (weak promoter) to double peak (strong promoter), much as it does in the native DV system when the Toll domain expands.

## DISCUSSION

In this study, we investigated the embryo-scale formation of the DI morphogen gradient in the early *Drosophila* embryo. Based on our model and experimental verification, we conclude that establishment of peak levels of the DI gradient is aided by a facilitated diffusion, or shuttling mechanism, in which DI/Cact complex diffuses towards the ventral midline, where Cact is degraded. Lowering the diffusivity of either DI or Cact widens the gradient rather than the narrowing that one might expect from a morphogen gradient established by (nonfacilitated) diffusion. The shuttling mechanism explains why DI tagged with a weakly dimerizing GFP widens the gradient more than one tagged with monomeric GFP (Reeves et al., 2012), and also explains the related observation that one copy of DI tagged with monomeric GFP variants complements loss of endogenous DI while one copy of DI-dGFP does not (Liberman et al., 2009; Reeves et al., 2012). Similarly, this mechanism makes sense of the observation that DI tagged with  $\beta$ -galactosidase, which forms tetramers, is antimorphic (Govind et al., 1992), as the DI moieties in tetramers of

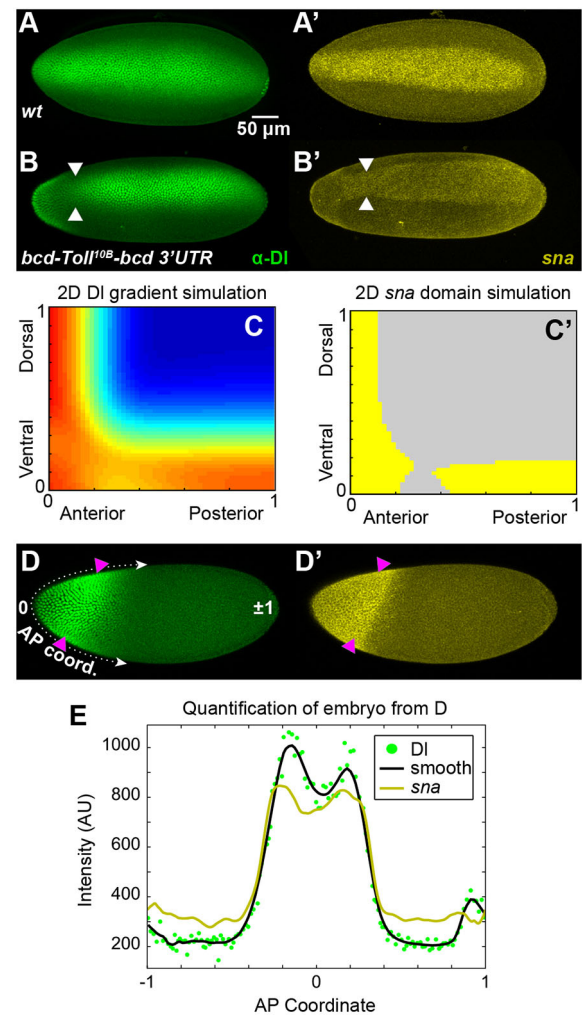

**Fig. 7. An ectopic, AP dorsal gradient exhibits shuttling phenomena.** (A,A') DI and *sna* expression in a wild-type embryo. (B,B') DI and *sna* expression in an embryo with an AP gradient of DI, driven by the *bcd* promoter in addition to the wild-type DV gradient. White arrowheads indicate a narrowing of each domain at ~30% egg length. (C,C') A 2D version of the model featuring AP and DV active Toll domains exhibiting a competing sink phenotype, in which a low point in the DI gradient leads to a decrease in *sna* expression. (D,D') DI and *sna* expression in an embryo with an AP gradient of DI, driven by the *Hsp83* promoter, and the DV gradient abolished by a homozygous mutation in *gd*. Magenta arrowheads show the second peak of expression; the peak is more clearly shown when the data are plotted in E. The definition of the AP coordinate for the plot in E is given, with 0 at the anterior pole, and  $\pm 1$  at the posterior pole. (E) Plot of DI and *sna* domains from the embryo in D. Each green dot is one nucleus and the black curve is a smoothing of the DI data. Embryo images are maximal intensity projections. See also Fig. S7.

DI- $\beta$ gal dimerize with endogenous DI to disrupt the formation of the endogenous DI gradient.

When the Toll gradient is greatly expanded, as in embryos from *Egfr<sup>rt</sup>* mothers (Roth and Schüpbach, 1994), the domains of saturated Toll receptors move further from the ventral midline, resulting in a split peak. This split-peak phenomenon has also been observed in the DI gradient in abnormally large embryos (Garcia et al., 2013). This specific phenotype could be explained by the shuttling of the Toll ligand Spz (Haskel-Ittah et al., 2012); however, we observed the same phenomenon in embryos with an ectopic AP DI gradient established by constitutively active Toll. In both cases, ventrally (anteriorly) diffusing DI/Cact complex does not reach the



ventral midline (anterior pole) before being dissociated, leaving the ventral (anterior)-most nuclei somewhat devoid of Dl. A similar mechanism, in which the removal rate of BMP ligands surpasses the rate of BMP flux to the dorsal midline, has been suggested to explain the computationally predicted split-peak phenotype for the BMP system in the early embryo (Umulis et al., 2006).

We further propose that active Toll receptors are saturated in the edges of the Toll domain in wild-type embryos; this saturation is not essential to the shuttling mechanism per se, though it is necessary for the mechanism to explain phenotypes associated with changing the dose of maternal *dl*. Under wild-type conditions, a significant flux of Dl/Cact complex can bypass the saturated active Toll receptors in the edges of the Toll domain, which results in the accumulation of a smooth, intense peak of Dl signaling at the ventral midline of the embryo. However, in *dl/+* embryos, there is not enough Dl/Cact complex to saturate active Toll receptors in the tails of the gradient, leading to less accumulation of Dl at the ventral midline (Lieberman et al., 2009). We have verified this assumption of active Toll saturation in *dl/+*; *Tl/+* and *Egfr<sup>1</sup>*; *dl<sup>RC</sup>* embryos.

The shuttling mechanism requires four biophysical processes: (1) Dl binding to Cact; (2) Dl/Cact complex readily diffusing through the embryo; (3) Toll signaling acting as a sink for Dl/Cact complex; and (4) Cact protecting Dl from entering the nuclei. As our experiments with Dl-paGFP show that Dl does indeed move globally through the embryo, it is now clear that Dl/Cact shuttling naturally arises in the early embryo. Indeed, our previous Dl/Cact model (O'Connell and Reeves, 2015) did not explicitly have shuttling 'programmed in', but instead it was a natural consequence of the model equations. In the same way, shuttling naturally emerges in previous models of the Dl gradient without the authors' explicit intention (Ambrosi et al., 2014; Kanodia et al., 2009).

Given the natural emergence of the shuttling mechanism from the topology of the known Dl/Cact interactions, one may ask whether the mechanism operates at a relevant level in the fly embryo. In the Dpp system, formation of peak levels of Dpp signaling requires the BMP antagonist Sog, which binds to Dpp and facilitates its diffusion to the dorsal midline of the early embryo. Loss of zygotic Sog function results in loss of both the highest levels of Dpp signal as well as the expression of genes that require those peak levels (Ashe and Levine, 1999; Zusman et al., 1988; Rushlow et al., 2001). Cact serves as the analog to Sog in the Dl/Cact system. A seminal study of Cact showed that loss of Cact function results in an expansion of the domain of cells expressing *twi*, a gene that requires peak levels of nuclear Dl (Roth et al., 1991), suggesting that there is no need for shuttling of Dl through Cact to form the peak levels of the Dl gradient. By contrast, a recent quantitative study, which analyzed embryos with varying levels of compromised *cact* function, could support the possibility that shuttling is necessary for embryonic fitness (Cardoso et al., 2017). Embryos with stronger loss of *cact* function have progressively flatter Dl gradients with lower peak values and progressively narrower domains of *sna*, which, like *twi*, requires peak levels of Dl (Cardoso et al., 2017). Curiously, the same study suggests a third role for Cact in establishing the Dl gradient: Cact fragments that result from Toll-independent degradation potentiate Dl signaling, which might explain most, if not all, their *cact* mutant phenotypes. Even so, the authors maintain the position that the shuttling mechanism could be necessary for the formation of peak Dl levels. Further work should be done to continue to dissect novel roles Cact might have in Dl gradient formation.

Regardless of the conflicting data from *cact* mutant embryos, the data presented here from the *dl*; *dl-dGFP/+* embryos show that, at minimum, the shuttling mechanism is required for formation of peak

levels of the Dl gradient (and the consequent *sna* expression) when Dl levels are compromised. Given the data presented here, the literature data explained by the shuttling hypothesis, and the fact that all biological processes required for shuttling are known to be present in the embryo, we suggest that Cact serves a dual role in establishing the Dl nuclear gradient: preventing nuclear translocation of Dl and shuttling of Dl.

## MATERIALS AND METHODS

### Fly lines

*yw* flies were used as wild type. *dl-paGFP*, *dl-mGFP* and *dl-dVenus* were created by BAC recombineering. For live imaging, flies carrying *dl-paGFP* were crossed to flies carrying H2A-RFP on the second chromosome (BS# 23651). *dl/+* flies were created by cleaning up *dl<sup>1</sup>* via two homologous recombinations with *yw* to generate *dl<sup>1.2.5</sup>*. *cact/+*; *cact-full lacZ* 25 flies were obtained from David Stein (Janelia Research Campus, Ashburn, VA, USA) (Fernandez et al., 2001). *dl-lacZ* flies were obtained from Govind et al. (1992). *dl-dGFP* and *dl-mVenus* flies and the original BACs used to create them were obtained from Angela Stathopoulos (California Institute of Technology, Pasadena, CA, USA). *dl-mGFP*, *dl<sup>1.2.5</sup>* flies were created by homologous recombination. Presence of *dl-mGFP* was confirmed by *w<sup>+</sup>*. Presence of *dl<sup>1.2.5</sup>* was confirmed via sequencing by GENEWIZ. *Egfr<sup>1</sup>/CyO* flies were obtained from the Bloomington *Drosophila* Stock Center (# 2079). Flies carrying the *bcd>Toll<sup>10b</sup>*: *bcd* 3' UTR construct were obtained from Angela Stathopoulos. The plasmid carrying *FRT-stop-FRT Hsp83>Toll<sup>10b</sup>*: *bcd* 3' UTR was also obtained from Angela Stathopoulos. To remove the FRT-stop-FRT cassette, we crossed flies carrying this construct into a line carrying *hsFLP* on the X chromosome (BS# 8862). To remove the native DV Dl gradient, flies carrying the *Toll<sup>10b</sup>*: *bcd* 3' UTR construct were crossed into a *gd<sup>7</sup>* background. See Supplementary Materials and Methods for more details. *dl/+*; *Tl/+* fly lines resulted from crossing the *dl<sup>1.2.5</sup>/+* fly line with *TP<sup>vi18</sup>/+* (BS# 30913).

### BAC recombineering

We followed Protocol 3 of the NCI at Frederick Recombineering website (<http://ncifrederick.cancer.gov/research/brb/recombineeringinformation.aspx>) to generate *dl-paGFP*, *dl-mGFP* and *dl-dVenus* in pACMAN (Venken et al., 2006). A proofreading Q5 DNA polymerase (New England Biolabs) was used to amplify sequences at a high level of authenticity. Using a GalK selection protocol (Warming et al., 2005), single amino acid mutations were introduced at residue 206 in previously established BACs (Reeves et al., 2012) to generate *dl-mGFP* (A206K) and *dl-dVenus* (K206A). *dl-paGFP* was created by adding the open reading frame of *paGFP* (Addgene plasmid #11911) (Patterson and Lippincott-Schwartz, 2002) in frame to the 3' end of the *dl* open reading frame in a *dl* rescue construct (Reeves et al., 2012) in pACMAN (Venken et al., 2006) using a 6x-Gly linker. See Table S1 for a list of primers used.

### Fluorescent *in situ* hybridization

All embryos were aged to 2–4 h, except for 'young' *yw* embryos, which were aged to 0–2 h, then fixed in 37% formaldehyde according to standard protocols (Kosman et al., 2004). A combination fluorescent *in situ* hybridization/fluorescent immunostaining was performed according to standard protocols (Kosman et al., 2004). Briefly, fixed embryos were washed in Tween/PBS buffer, then hybridized with a digoxigenin-conjugated anti-sense *sna* probe at 55°C overnight. The embryos were then washed and incubated with primary antibodies at 4°C overnight. Next, the embryos were washed and incubated for 1–2 h with fluorescent secondary antibodies at room temperature. The embryos were then washed and stored in 70% glycerol at –20°C. Embryos were imaged within one month of completing the protocol. See Supplementary Materials and Methods for more details, including suppliers and dilutions of antibodies.

### Mounting and imaging of fixed samples

Embryos were cross-sectioned and mounted in 70% glycerol as described previously (Carrell and Reeves, 2015). Briefly, a razor blade was used to remove the anterior and posterior thirds of the embryo, leaving a cross

section  $\sim 200\ \mu\text{m}$  long by  $200\ \mu\text{m}$  in diameter. These sections were then oriented such that the cut sides became the top and bottom. They were imaged at  $20\times$  magnification on a Zeiss LSM 710 microscope. Fifteen z-slices  $1.5\ \mu\text{m}$  apart were analyzed. Embryos with an AP Dorsal gradient were mounted laterally in 70% glycerol using one piece of double-sided tape (weak *bcd* promoter) or two pieces of double-sided tape (strong *Hsp83* promoter). Images were taken at  $2.5\ \mu\text{m}$  intervals from just above the top of the embryo to the depth at which the embryo reached maximal size in the *xy* plane, which was assumed to be the midsagittal section. Stacks ranged from 15 to 25 slices.

### Data analysis

Images of embryo cross sections were analyzed using previously derived code (Trisnadi et al., 2013). Briefly, the border of the embryo was found computationally, then the nuclei were segmented using a local thresholding protocol. The intensity of DI in each segmented nucleus was calculated as the ratio between the intensity in the DI channel divided by the intensity in the nuclear channel (Damle et al., 2006; Liberman et al., 2009). The intensity of mRNA expression and total DI were calculated as average intensity within an annulus  $\sim 18\ \mu\text{m}$  wide around the perimeter of the embryo. A description of the image analysis of whole-mount embryos can be found in the Supplementary Materials and Methods and in Jermusyk et al. (2016).

All DI gradients were fit to a Gaussian, and these fits were used to determine the width parameter,  $\sigma$ , and to normalize the DI gradients. An  $r^2$  goodness of fit was calculated for each embryo, and if this fell below 0.80, the measurement was discarded. Widths of *sna* domains were found by fitting the *sna* intensity curves to canonical profiles. For further explanation of these two procedures, see the Supplementary Materials and Methods. All replicates were biological.

Statistical significance was calculated using two-tailed homoscedastic *t*-tests. For 80% power, minimum sample size was calculated to be  $<10$  embryos for our measurements of the DI gradient width.

### Activating paGFP in live embryos

Embryos were dechorionated by hand or for 30 s in 100% bleach. They were then mounted laterally on a slide coated with heptane glue. Deionized water was used as a mounting medium. Two pieces of double-sided tape were used to attach the coverslip. Images were taken using a  $40\times$  water immersion objective on an LSM 710 confocal microscope. Activation box: 9000 pixels ( $300\times 300\ \mu\text{m}$ ); number of activation passes (number of times the laser activates the region in a single cycle): 10; rest time (the length of rest time between cycles): 15 s; number of cycles: 40. Each activation session lasted  $\sim 25$  min and was followed by imaging the entire depth of the embryo. Each embryo underwent five activation sessions. Laser power was 3% for embryos activated near the ventral midline, and 2.5% for embryos activated near the dorsal midline. A 405 nm laser was used for activation and a 488 nm laser was used for excitation of the activated GFP.

### Model of DI/Cact interactions

In Figs 2 and 3, we used a simplified version of previously published models of DI/Cact interactions to predict the effects of slowing diffusion (O'Connell and Reeves, 2015; Kanodia et al., 2009; Ambrosi et al., 2014). In brief, this model consists of four differential equations, representing nuclear and cytoplasmic DI, and cytoplasmic DI/Cact complex and Cact, respectively (Eqns 1–4; see also Fig. 2A for a schematic of the modeled processes).

$$\frac{\partial C_{DI,nuc}}{\partial t} = k_{in}C_{DI,cyt} - k_{out}C_{DI,nuc}, \quad (1)$$

$$\frac{\partial C_{DI,cyt}}{\partial t} = D_{DI} \frac{\partial^2 C_{DI,cyt}}{\partial x^2} - k_{in}C_{DI,cyt} + k_{out}C_{DI,nuc} - k_{bind}C_{DI,cyt}C_{Cact} + k_{diss}(x)C_{DC}, \quad (2)$$

$$\frac{\partial C_{DC}}{\partial t} = D_{DC} \frac{\partial^2 C_{DC}}{\partial x^2} + k_{bind}C_{DI,cyt}C_{Cact} - k_{diss}(x)C_{DC}, \quad (3)$$

$$\frac{\partial C_{Cact}}{\partial t} = D_{Cact} \frac{\partial^2 C_{Cact}}{\partial x^2} + V_{cact} - k_{deg}C_{Cact} - k_{bind}C_{DI,cyt}C_{Cact} + k_{diss}(x)C_{DC}. \quad (4)$$

To simplify analysis and interpretation, we simulated 100 min of development with 51 nuclei positioned along a linear (*x*) axis and ignore mitosis and nuclear division. The active Toll gradient was modeled phenomenologically in space as  $k_{diss}(x) = k_{diss,0} \exp(-0.5x^2/\phi^2)$  (Ambrosi et al., 2014; Kanodia et al., 2009; O'Connell and Reeves, 2015). In the Toll saturation model (Figs 4–7), activated Toll receptors were allowed to saturate (Fig. 4G), which altered the DI/Cact complex dissociation term to a Michaelis–Menten-like saturable function (see Supplementary Materials and Methods). In other words, the final term in Eqns 2–4 became  $k_{diss}C_{DC}/(K_R + C_{DC})$ , where  $K_R$  is a Michaelis constant for Toll saturation. For more details on the model formulation, see Supplementary Materials and Methods.

To calculate flux of DI-containing species, we applied Fick's law, which states that diffusive flux,  $J$ , which refers to the movement of a solute from areas of high concentration to areas of low concentration, occurs at a rate proportional to its concentration gradient,  $dC/dx$ , yielding  $J = -DdC/dx$ . The negative sign accounts for the fact that diffusive flux is in the direction of decreasing concentration, and  $D$  is the diffusion coefficient. By convention, we define our *x*-axis to be equal to 0 at the ventral midline and 1 at the dorsal midline (Fig. 2A); thus, a negative value for the flux indicates movement toward the ventral midline, and a positive value indicates movement toward the dorsal midline. Therefore, the calculation of flux of DI-containing species (cytoplasmic DI+DI/Cact complex) is performed using the following equation:

$$J(x, t) = -D_{DI} \frac{\partial C_{DI,cyt}}{\partial x} - D_{DC} \frac{\partial C_{DC}}{\partial x}. \quad (5)$$

Shuttling was defined as  $J(x=0.33, t=100) < 0$ . This occurred when  $D_{DC}/[D_{DI}/K_{eq}] > 1$ , where  $K_{eq} = k_{in}/k_{out}$  (see Fig. 2B).

To ensure our results were not the result of oversimplification, we also formulated a more complete (full) model of DI/Cact/Toll interactions, which is an extension to the model found in O'Connell and Reeves (2015). This full model (see Supplementary Materials and Methods) consists of differential equations for three species distributed between two compartments: nuclear DI, cytoplasmic DI, nuclear Cact, cytoplasmic Cact, nuclear DI/Cact complex, and cytoplasmic DI/Cact complex, plus an equation for free active Toll receptor and one for active Toll receptor bound to DI/Cact complex. It takes into account the mitosis and interphase associated with nc 10–14 and the possibility that Cact and DI/Cact complex could be present in the nucleus. During mitosis, the nucleus becomes undefined, and the contents of each nucleus mix with those of the surrounding cytoplasm. At the end of mitosis, the nucleus reforms, and the concentration of DI, Cact and DI/Cact inside the nucleus is initialized as equal to their respective concentrations in the cytoplasm, and each species can enter and exit the nucleus. All cytoplasmic species can move between adjacent cytoplasmic compartments during interphase and mitosis.

The production rate of activated Toll receptors was modeled phenomenologically. The eight differential equations were nondimensionalized, resulting in a model with 20 free parameters. Optimization was performed in MATLAB (MathWorks) using an evolutionary optimization algorithm with stochastic ranking (Runarsson and Yao, 2000, 2005), yielding 114 parameter sets that were generally consistent with the spatiotemporal data published by Reeves et al. (2012). Further detail on model equations and analysis can be found in the Supplementary Materials and Methods.

We also analyzed two previous models of DI/Cact interactions, which each have the processes necessary for shuttling, to investigate whether these processes together are sufficient for shuttling (Kanodia et al., 2009; Ambrosi et al., 2014). See Supplementary Materials and Methods for more details.

### Acknowledgements

We thank Angela Stathopoulos and Leslie Dunipace for provision of DI-dGFP and DI-mVenus flies and BACs, *bcd>Toll<sup>10b</sup>:bcd 3' UTR* flies, and the DNA used to generate *Hsp83>Toll<sup>10b</sup>:bcd 3' UTR* flies. We are grateful to ImmunoReagents for providing goat anti-biotin antibody, Alex Thomas for generating the *sna*-biotin probe, Parv Gondalia for generating the *sna*-FITC probe, David Stein for providing the *cact-lacZ* fly line, and Shubba Govind for providing the *dl-lacZ* flies.

## Competing interests

The authors declare no competing or financial interests.

## Author contributions

Conceptualization: S.N.C., M.D.O., G.T.R.; Methodology: G.T.R.; Validation: S.N.C., M.D.O., G.T.R.; Formal analysis: S.N.C., M.D.O., G.T.R.; Investigation: S.N.C., M.D.O., T.J., A.E.P., S.M.H., G.T.R.; Writing - original draft: S.N.C., M.D.O., G.T.R.; Writing - review & editing: S.N.C., M.D.O., G.T.R.; Supervision: G.T.R.; Project administration: G.T.R.; Funding acquisition: G.T.R.

## Funding

This work was supported by the National Science Foundation [CBET-1254344 to G.T.R.] and the U.S. Department of Education [Graduate Assistance in Areas of National Need Biotechnology Fellowship to S.N.C. (P200A100004) and T.J. (P200A140020), and Scientific Computing Fellowship to M.D.O. (P200A120047)].

## Data availability

All MATLAB files used for the model and data analysis are available from <https://github.ncsu.edu/> and additionally on the Reeves Lab website ([people.engr.ncsu.edu/gtreeves/](http://people.engr.ncsu.edu/gtreeves/)). All image files are available from the Dryad Digital Repository (Carrell et al., 2017): doi:10.5061/dryad.4h00t.

## Supplementary information

Supplementary information available online at <http://dev.biologists.org/lookup/doi/10.1242/dev.155549.supplemental>

## References

- Ali-Murthy, Z. and Kornberg, T. B. (2016). Bicoid gradient formation and function in the *Drosophila* pre-synctial blastoderm. *eLife* **5**, e13222.
- Ambrosi, P., Chahda, J. S., Koslen, H. R., Chiel, H. J. and Mizutani, C. M. (2014). Modeling of the dorsal gradient across species reveals interaction between embryo morphology and toll signaling pathway during evolution. *PLoS Comput. Biol.* **10**, e1003807.
- Ashe, H. L. and Levine, M. (1999). Local inhibition and long-range enhancement of Dpp signal transduction by Sog. *Nature* **398**, 427–431.
- Belenkaya, T. Y., Han, C., Yan, D., Opoka, R. J., Khodoun, M., Liu, H. and Lin, X. (2004). *Drosophila* Dpp morphogen movement is independent of Dynamin-mediated endocytosis but regulated by the glypican members of heparan sulfate proteoglycans. *Cell* **119**, 231–244.
- Belvin, M. P., Jin, Y. and Anderson, K. V. (1995). Cactus protein degradation mediates *Drosophila* dorsal-ventral signaling. *Genes Dev.* **9**, 783–793.
- Ben-Zvi, D., Shilo, B.-Z., Fainsod, A. and Barkai, N. (2008). Scaling of the BMP activation gradient in *Xenopus* embryos. *Nature* **453**, 1205–1211.
- Bergmann, A., Stein, D., Geisler, R., Hagenmaier, S., Schmid, B., Fernandez, N., Schnell, B. and Nüsslein-Volhard, C. (1996). A gradient of cytoplasmic Cactus degradation establishes the nuclear localization gradient of the dorsal morphogen in *Drosophila*. *Mech. Dev.* **60**, 109–123.
- Cardoso, M. A., Fontenele, M., Lim, B., Bisch, P. M., Shvartsman, S. Y. and Araujo, H. M. (2017). A novel function for the I $\kappa$ B inhibitor Cactus in promoting Dorsal nuclear localization and activity in the *Drosophila* embryo. *Development* **144**, 2907–2913.
- Carrell, S. N. and Reeves, G. T. (2015). Imaging the dorsal-ventral axis of live and fixed *Drosophila* melanogaster embryos. In *Tissue Morphogenesis. Methods in Molecular Biology* (ed. C. M. Nelson), pp. 63–78. New York: Springer.
- Chopra, V. S. and Levine, M. (2009). Combinatorial patterning mechanisms in the *Drosophila* embryo. *Brief. Funct. Genomic. Proteomic.* **8**, 243–249.
- Christian, J. L. (2012). Morphogen gradients in development: from form to function. *Wiley Interdiscip. Rev. Dev. Biol.* **1**, 3–15.
- Damle, S., Hanser, B., Davidson, E. H. and Fraser, S. E. (2006). Confocal quantification of cis-regulatory reporter gene expression in living sea urchin. *Test* **299**, 543–550.
- Delotto, R., Delotto, Y., Steward, R. and Lippincott-Schwartz, J. (2007). Nucleocytoplasmic shuttling mediates the dynamic maintenance of nuclear Dorsal levels during *Drosophila* embryogenesis. *Development* **134**, 4233–4241.
- Dorfman, R. and Shilo, B. Z. (2001). Biphasic activation of the BMP pathway patterns the *Drosophila* embryonic dorsal region. *Development* **128**, 965–972.
- Drier, E. A., Huang, L. H. and Steward, R. (1999). Nuclear import of the *Drosophila* Rel protein Dorsal is regulated by phosphorylation. *Genes Dev.* **13**, 556–568.
- Drier, E. A., Govind, S. and Steward, R. (2000). Cactus-independent regulation of Dorsal nuclear import by the ventral signal. *Curr. Biol.* **10**, 23–26.
- Driever, W. and Nüsslein-Volhard, C. (1988). A gradient of bicoid protein in *Drosophila* embryos. *Cell* **54**, 83–93.
- Eldar, A., Dorfman, R., Weiss, D., Ashe, H., Shilo, B. Z. and Barkai, N. (2002). Robustness of the BMP morphogen gradient in *Drosophila* embryonic patterning. *Nature* **419**, 304–308.
- Entchev, E. V., Schwabedissen, A. and González-Gaitán, M. A. (2000). Gradient formation of the TGF- $\beta$  homolog Dpp. *Cell* **103**, 981–991.
- Fahmy, K., Akber, M., Cai, X., Koul, A., Hayder, A. and Baumgartner, S. (2014).  $\alpha$ Tubulin 67C and Ncd are essential for establishing a cortical microtubular network and formation of the Bicoid mRNA gradient in *Drosophila*. *PLoS ONE* **9**, e112053.
- Fernandez, N. Q., Grosshans, J., Goltz, J. S. and Stein, D. (2001). Separable and redundant regulatory determinants in Cactus mediate its dorsal group dependent degradation. *Development* **128**, 2963–2974.
- Garcia, M. Nahmad, M., Reeves, G. T. and Stathopoulos, A. (2013). Size-dependent regulation of dorsal-ventral patterning in the early *Drosophila* embryo. *Dev. Biol.* **381**, 286–299.
- Govind, S., Whalen, A. M. and Steward, R. (1992). In vivo self-association of the *Drosophila* rel-protein dorsal. *Proc. Natl. Acad. Sci. USA* **89**, 7861–7865.
- Govind, S., Drier, E., Huang, L. H. and Steward, R. (1996). Regulated nuclear import of the *Drosophila* rel protein dorsal: structure-function analysis. *Mol. Cell. Biol.* **16**, 1103–1114.
- Gregor, T., Bialek, W., de Ruyter van Steveninck, R. R., Tank, D. W. and Wieschaus, E. F. (2005). Diffusion and scaling during early embryonic pattern formation. *Proc. Natl. Acad. Sci. USA* **102**, 18403–18407.
- Gregor, T., Wieschaus, E. F., McGregor, A. P., Bialek, W. and Tank, D. W. (2007). Stability and nuclear dynamics of the Bicoid morphogen gradient. *Cell* **130**, 141–152.
- Guerrero, I. and Kornberg, T. B. (2014). Hedgehog and its circuitous journey from producing to target cells. *Semin. Cell Dev. Biol.* **33**, 52–62.
- Haskel-Ittah, M., Ben-Zvi, D., Branski-Arieli, M., Schejter, E. D., Shilo, B.-Z. and Barkai, N. (2012). Self-organized shuttling: generating sharp dorsoventral polarity in the early *drosophila* embryo. *Cell* **150**, 1016–1028.
- Holley, S. A., Neul, J. L., Attisano, L., Wrana, J. L., Sasai, Y., O'Connor, M. B., De Robertis, E. M. and Ferguson, E. L. (1996). The *Xenopus* dorsalizing factor noggin ventralizes *Drosophila* embryos by preventing DPP from activating its receptor. *Cell* **86**, 607–617.
- Houchmandzadeh, B., Wieschaus, E. and Leibler, S. (2002). Establishment of developmental precision and proportions in the early *Drosophila* embryo. *Nature* **415**, 798–802.
- Huang, A. M., Rusch, J. and Levine, M. (1997). An anteroposterior Dorsal gradient in the *Drosophila* embryo. *Genes Dev.* **11**, 1963–1973.
- Isoda, K., Roth, S. and Nüsslein-Volhard, C. (1992). The functional domains of the *Drosophila* morphogen dorsal: evidence from the analysis of mutants. *Genes Dev.* **6**, 619–630.
- Jermusyk, A. A., Murphy, N. P. and Reeves, G. T. (2016). Analyzing negative feedback using a synthetic gene network expressed in the *Drosophila* melanogaster embryo. *BMC Syst. Biol.* **10**, 85.
- Kanodia, J. S., Rikhy, R., Kim, Y., Lund, V. K., Delotto, R., Lippincott-Schwartz, J. and Shvartsman, S. Y. (2009). Dynamics of the Dorsal morphogen gradient. *Proc. Natl. Acad. Sci. USA* **106**, 21707–21712.
- Kosman, D., Mizutani, C. M., Lemons, D., Cox, W. G., McGinnis, W. and Bier, E. (2004). Multiplex detection of RNA expression in *Drosophila* embryos. *Science* **305**, 846.
- Lander, A. D., Nie, Q. and Wan, F. Y. M. (2002). Do morphogen gradients arise by diffusion? *Dev. Cell* **2**, 785–796.
- Liberman, L. M., Reeves, G. T. and Stathopoulos, A. (2009). Quantitative imaging of the Dorsal nuclear gradient reveals limitations to threshold-dependent patterning in *Drosophila*. *Proc. Natl. Acad. Sci. U.S.A.* **106**, 22317–22322.
- Little, S. C., Tkačik, G., Kneeland, T. B., Wieschaus, E. F. and Gregor, T. (2011). The formation of the Bicoid morphogen gradient requires protein movement from anteriorly localized mRNA. *PLoS Biol.* **9**, e1000596.
- Marqués, G., Musacchio, M., Shimell, M. J., Wünnenberg-Stapleton, K., Cho, K. W. Y. and O'Connor, M. B. (1997). Production of a DPP activity gradient in the early *Drosophila* embryo through the opposing actions of the SOG and TLD proteins. *Cell* **91**, 417–426.
- Matsuda, S., Harmansa, S. and Affolter, M. (2016). BMP morphogen gradients in flies. *Cytokine Growth Factor. Rev.* **27**, 119–127.
- Meinhardt, H. (2004). Different strategies for midline formation in bilaterians. *Nat. Rev. Neurosci.* **5**, 502–510.
- Mizutani, C. M., Nie, Q., Wan, F. Y. M., Zhang, Y.-T., Vilmos, P., Sousa-Neves, R., Bier, E., Marsh, J. L. and Lander, A. D. (2005). Formation of the BMP activity gradient in the *drosophila* embryo. *Dev. Cell* **8**, 915–924.
- Moussian, B. and Roth, S. (2005). Dorsoventral axis formation in the *Drosophila* embryo-shaping and transducing a morphogen gradient. *Curr. Biol.* **15**, R887–R899.
- Müller, P., Rogers, K. W., Yu, S. R., Brand, M. and Schier, A. F. (2013). Morphogen transport. *Development* **140**, 1621–1638.
- O'Connell, M. D. and Reeves, G. T. (2015). The presence of nuclear cactus in the early *Drosophila* embryo may extend the dynamic range of the dorsal gradient. *PLoS Comput. Biol.* **11**, e1004159.
- Patterson, G. H. and Lippincott-Schwartz, J. (2002). A photoactivatable GFP for selective photolabeling of proteins and cells. *Science (New York, N.Y.)* **297**, 1873–1877.
- Rahimi, N., Averbukh, I., Haskel-Ittah, M., Degani, N., Schejter, E. D., Barkai, N. and Shilo, B.-Z. (2016). A WntD-dependent integral feedback loop attenuates variability in *drosophila* toll signaling. *Dev. Cell* **36**, 401–414.



- Reach, M., Galindo, R. L., Towb, P., Allen, J. L., Karin, M. and Wasserman, S. A. (1996). A gradient of cactus protein degradation establishes dorsoventral polarity in the *Drosophila* embryo. *Dev. Biol.* **180**, 353–364.
- Reeves, G. T. and Stathopoulos, A. (2009). Graded dorsal and differential gene regulation in the *Drosophila* embryo. *Cold Spring Harb. Perspect. Biol.* **1**, a000836.
- Reeves, G. T., Trisnadi, N., Truong, T. V., Nahmad, M., Katz, S. and Stathopoulos, A. (2012). Dorsal-ventral gene expression in the *Drosophila* embryo reflects the dynamics and precision of the dorsal nuclear gradient. *Dev. cell*, **22**, 544–557.
- Roth, S. and Schüpbach, T. (1994). The relationship between ovarian and embryonic dorsoventral patterning in *Drosophila*. *Development* **120**, 2245–2257.
- Roth, S., Stein, D. and Nüsslein-Volhard, C. (1989). A gradient of nuclear localization of the dorsal protein determines dorsoventral pattern in the *Drosophila* embryo. *Cell* **59**, 1189–1202.
- Roth, S., Hiromi, Y., Godt, D. and Nüsslein-Volhard, C. (1991). cactus, a maternal gene required for proper formation of the dorsoventral morphogen gradient in *Drosophila* embryos. *Development* **112**, 371–388.
- Roy, S., Huang, H., Liu, S. and Kornberg, T. B. (2014). Cytoneme-mediated contact-dependent transport of the *Drosophila* decapentaplegic signaling protein. *Science* **343**, 1244624.
- Runarsson, T. P. and Yao, X. (2000). Stochastic ranking for constrained evolutionary optimization. *IEEE Trans. Evol. Comput.* **4**, 284–294.
- Runarsson, T. P. and Yao, X. (2005). Search biases in constrained evolutionary optimization. *IEEE Trans. Syst. Man Cybern. C Appl. Rev.* **35**, 233–243.
- Rushlow, C. A. and Shvartsman, S. Y. (2012). Temporal dynamics, spatial range, and transcriptional interpretation of the Dorsal morphogen gradient. *Curr. Opin. Genet. Dev.* **22**, 542–546.
- Rushlow, C., Colosimo, P. F., Lin, M. C., Xu, M. and Kirov, N. (2001). Transcriptional regulation of the *Drosophila* gene *zen* by competing Smad and Brinker inputs. *Genes Dev.* **15**, 340–351.
- Schüpbach, T. (1987). Germ line and soma cooperate during oogenesis to establish the dorsoventral pattern of egg shell and embryo in *Drosophila melanogaster*. *Cell* **49**, 699–707.
- Schwank, G., Dalessi, S., Yang, S. F., Yagi, R., de Lachapelle, A. M., Affolter, M., Bergmann, S. and Basler, K. (2011). Formation of the long range dpp morphogen gradient. *PLoS Biol.* **9**, e1001111.
- Sen, J., Goltz, J. S., Stevens, L. and Stein, D. (1998). Spatially restricted expression of pipe in the *Drosophila* egg chamber defines embryonic dorsal–ventral polarity. *Cell* **95**, 471–481.
- Shilo, B.-Z., Haskel-Ittah, M., Ben-Zvi, D., Schejter, E. D. and Barkai, N. (2013). Creating gradients by morphogen shuttling. *Trends Genet.* **29**, 339–347.
- Shimmi, O., Umulis, D., Othmer, H. and O'Connor, M. B. (2005). Facilitated transport of a Dpp/Scw heterodimer by Sog/Tsg leads to robust patterning of the *Drosophila* blastoderm embryo. *Cell* **120**, 873–886.
- Smith, J. C. (2009). Forming and interpreting gradients in the early *Xenopus* embryo. *Cold Spring Harbor Perspect. Biol.* **1**, a002477.
- Spirov, A., Fahmy, K., Schneider, M., Frei, E., Noll, M. and Baumgartner, S. (2009). Formation of the bicoid morphogen gradient: an mRNA gradient dictates the protein gradient. *Development* **136**, 605–614.
- Stathopoulos, A. and Levine, M. (2002). Dorsal gradient networks in the *Drosophila* embryo. *Dev. Biol.* **246**, 57–67.
- Steward, R., Zusman, S. B., Huang, L. H. and Schedl, P. (1988). The dorsal protein is distributed in a gradient in early *Drosophila* embryos. *Cell* **55**, 487–495.
- Trisnadi, N., Altinok, A., Stathopoulos, A. and Reeves, G. T. (2013). Image analysis and empirical modeling of gene and protein expression. *Methods (San Diego, Calif.)* **62**, 68–78.
- Umulis, D. M., Serpe, M., O'Connor, M. B. and Othmer, H. G. (2006). Robust, bistable patterning of the dorsal surface of the *Drosophila* embryo. *Proc. Natl. Acad. Sci. USA* **103**, 11613–11618.
- Venken, K. J. T., He, Y., Hoskins, R. A. and Bellen, H. J. (2006). P[acman]: a BAC transgenic platform for targeted insertion of large DNA fragments in *D. melanogaster*. *Science (New York, N. Y.)* **314**, 1747–1751.
- Wang, Y.-C. and Ferguson, E. L. (2005). Spatial bistability of Dpp-receptor interactions during *Drosophila* dorsal-ventral patterning. *Nature* **434**, 229–234.
- Warming, S., Costantino, N., Court, D. L., Jenkins, N. A. and Copeland, N. G. (2005). Simple and highly efficient BAC recombineering using galK selection. *Nucleic Acids Res.* **33**, e36.
- Wartlick, O., Kicheva, A. and González-Gaitán, M. (2009). Morphogen gradient formation. *Spring* **1**, a001255.
- Whalen, A. M. and Steward, R. (1993). Dissociation of the Dorsal-Cactus complex and phosphorylation of the Dorsal protein correlate with the nuclear localization of Dorsal. *J. Cell Biol.* **123**, 523–534.
- Zacharias, D. A., Violin, J. D., Newton, A. C. and Tsien, R. Y. (2002). Partitioning of lipid-modified monomeric GFPs into membrane microdomains of live cells. *Science* **296**, 913–916.
- Zusman, S. B., Sweeton, D. and Wieschaus, E. F. (1988). short gastrulation, a mutation causing delays in stage-specific cell shape changes during gastrulation in *Drosophila melanogaster*. *Dev. Biol.* **129**, 417–427.
